# Supplementary material for: Using Mobile Health Technology to Deliver a Community-Based Closed-Loop Management System for Chronic Obstructive Pulmonary Disease Patients in Remote Areas of China: Development and Prospective Observational Study
Source: PubMed Central journal article supplement (PMC7725649; doi:10.2196/15978), 2020-11-25
Supplement: mhealth_v8i11e15978_app2.pdf [file mhealth_v8i11e15978_app2.pdf]

## mHealth System Description

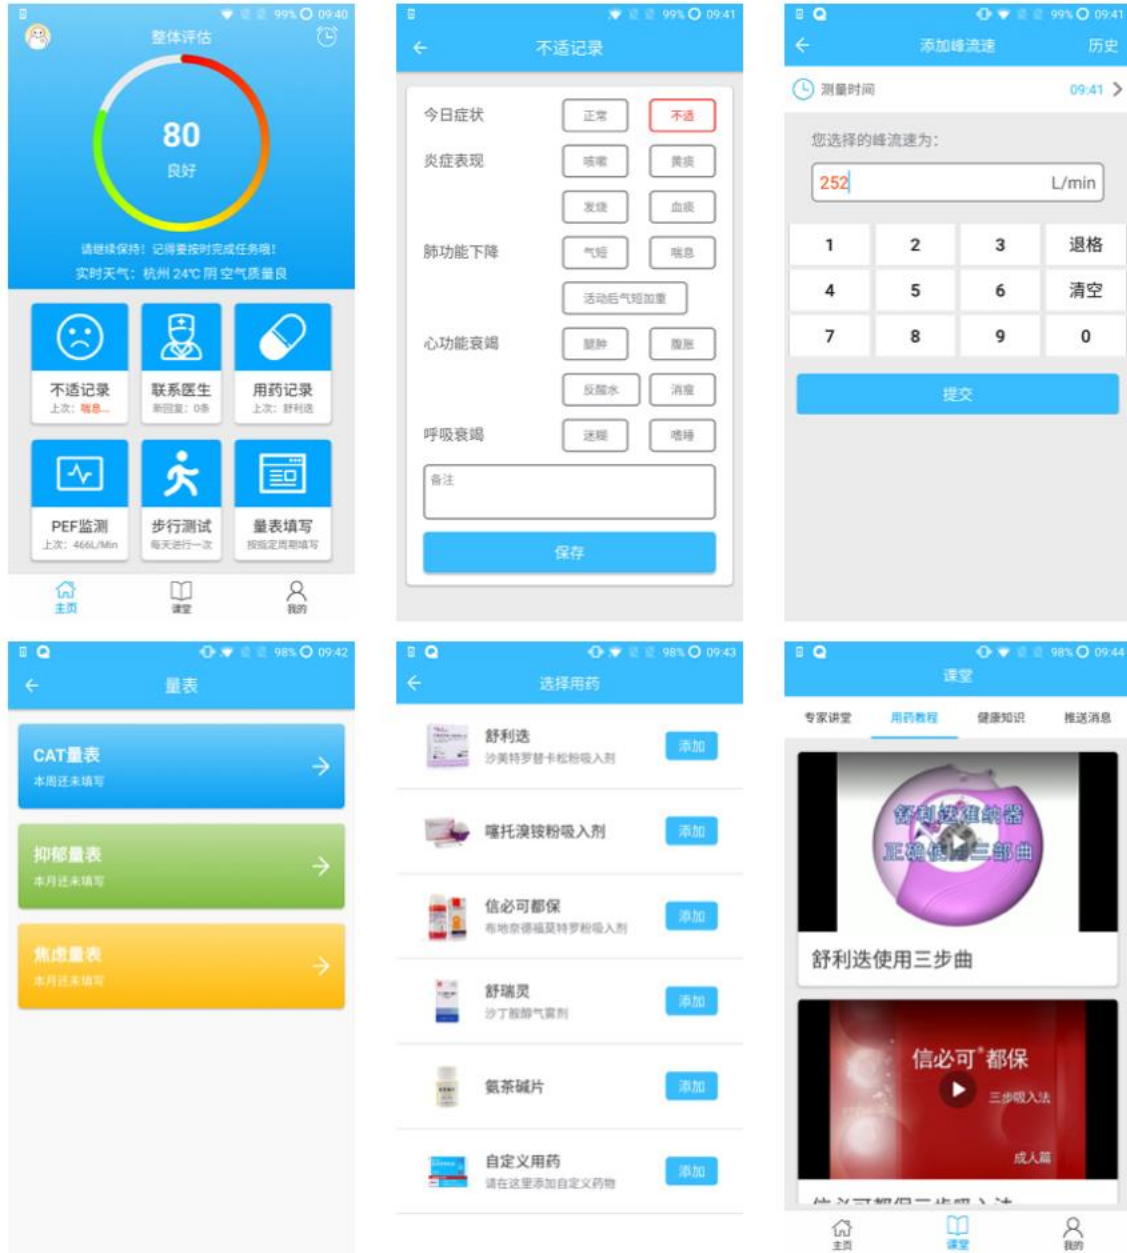

Supplementary Figure 1 Snapshots of Patient app

预警患者列表(99) 不适预警(85) PEF预警(22) CAT量表预警(44) HAD量表预警(28)

每页显示 10 条记录 Search:

| 序号 | 姓名 | 年龄 | 性别 | 预警类型                   | 预警种类数 | 预警详情 | 忽略所有预警 |
|----|----|----|----|------------------------|-------|------|--------|
| 1  | 陈  | 65 | 男  | PEF; CAT; GAD; PHQ; 不适 | 5     |      | ✕      |
| 2  | 郭  | 64 | 男  | PEF; CAT; GAD; PHQ; 不适 | 5     |      | ✕      |
| 3  | 郭  | 65 | 男  | PEF; CAT; GAD; PHQ; 不适 | 5     |      | ✕      |
| 4  | 丁  | 52 | 男  | CAT; GAD; PHQ; 不适      | 4     |      | ✕      |
| 5  | 吴  | 73 | 男  | CAT; GAD; PHQ; 不适      | 4     |      | ✕      |
| 6  | 王  | 60 | 男  | CAT; GAD; PHQ; 不适      | 4     |      | ✕      |
| 7  | 李  | 72 | 女  | CAT; GAD; PHQ; 不适      | 4     |      | ✕      |
| 8  | 沈  | 49 | 男  | CAT; GAD; PHQ; 不适      | 4     |      | ✕      |
| 9  | 周  | 65 | 男  | CAT; GAD; PHQ; 不适      | 4     |      | ✕      |
| 10 | 胡  | 74 | 男  | PEF; CAT; GAD; 不适      | 4     |      | ✕      |

前一页 1 2 3 4 5 ... 10 后一页

**基本情况**

**自测数据**

自测数据

康复数据

院内数据

录入检查信息

录入检查信息

录入急性加重

随访记录

问卷记录

消息推送

留言回复

天气状况

**自测数据**

服药记录 PEF记录 CAT量表记录 PHQ抑郁量表 GAD焦虑量表 HAD焦虑量表 不适记录

六分钟步行试验记录 急性加重症状记录

开始时间: 2020-04-09 结束时间: 2020-06-08

月平均值

CAT量表趋势图



**患者管理**

取消随访 就诊记录 填写问卷 终止管理

**电话随访**

随访有效:  有效  无效

无效原因:  停机  无人接听  号码有误

生活质量:  良好  一般  不佳

身体状况:  良好  一般  不佳

心理状况:  良好  一般  不佳

服药状况:  良好  一般  不佳

有无加重症状:  有  无

**急性加重症状:**

请写患者发生的急性加重症状

有无新增不适:  有  无

**新增不适症状:**

请写患者发生的新增不适症状

**其他情况**

是否吸烟:  是  否  已戒烟

Supplementary Figure 2 Snapshots of Doctor workstation

Supplementary Table 1 Function list of mHealth System in this study

| Functions                       | Descriptions                                                             |
|---------------------------------|--------------------------------------------------------------------------|
| <b>Patient app</b>              |                                                                          |
| <b>Diary module</b>             |                                                                          |
| PEF <sub>a</sub> value record   | Used to record PEF values.                                               |
| CAT <sub>b</sub> scale record   | Used to fill out CAT scale and record the result.                        |
| PHQ-9 <sub>c</sub> scale record | Used to fill out these two scales and record results.                    |
| GAD-7 <sub>d</sub> scale record |                                                                          |
| Medication record               | Used to record daily medication.                                         |
| Symptom                         | Patient can select the corresponding symptoms if he feels uncomfortable. |

|                           |                                                |                                                                                                                                                                                |
|---------------------------|------------------------------------------------|--------------------------------------------------------------------------------------------------------------------------------------------------------------------------------|
|                           | 6-minute walk test record                      | Patient could take a 6-minute walk test according to the app's instructions and the test result will be automatically measured via GPS and saved.                              |
|                           | Local air quality data                         | Record data provided by <a href="http://www.heweather.com">www.heweather.com</a> every day for each participant based on their address.                                        |
| <b>Education module</b>   |                                                |                                                                                                                                                                                |
|                           | Knowledge                                      | This app provides videos and texts associated with inhalants guidance, pulmonary rehabilitation, smoke cessation and other COPD-related knowledge or health tips. <sup>e</sup> |
|                           | Communication                                  | Patients will receive personalized materials according to their current situation                                                                                              |
| <b>Doctor workstation</b> |                                                |                                                                                                                                                                                |
| <b>Warning module</b>     |                                                |                                                                                                                                                                                |
|                           | PEF value warning                              | Detect and alert abnormal data uploaded by patients.                                                                                                                           |
|                           | CAT scale warning                              |                                                                                                                                                                                |
|                           | PHQ-9 scale warning                            |                                                                                                                                                                                |
|                           | GAD-7 scale warning                            |                                                                                                                                                                                |
|                           | Symptom                                        |                                                                                                                                                                                |
| <b>Follow-up module</b>   |                                                |                                                                                                                                                                                |
|                           | Follow-up                                      | Used to record the follow-up context in a uniform format.                                                                                                                      |
|                           | Communication                                  | Send messages or materials to patients.                                                                                                                                        |
| <b>Data module</b>        |                                                |                                                                                                                                                                                |
|                           | Demographic information                        | Including patient name, gender, age, height, weight, et al.                                                                                                                    |
|                           | In-hospital laboratory and examination results | Including blood routine test, blood biochemical test, blood gas analysis data, pulmonary function test, CT and ultrasonography from the EMR system in the hospital.            |
|                           | Self-management data                           | All the data uploaded via patient app. The data is presented in the form of tables and graphs.                                                                                 |
| <b>Cloud server</b>       |                                                |                                                                                                                                                                                |
|                           | Data store                                     | Store all the data securely.                                                                                                                                                   |
|                           | Inference engine                               | Providing decision support.                                                                                                                                                    |
|                           | Recommendation service                         | Delivering educational materials.                                                                                                                                              |

<sup>a</sup>PEF: peak expiratory flow

<sup>b</sup>CAT: COPD Assessment Test

<sup>c</sup>GAD-7: Generalized Anxiety Disorder 7

<sup>d</sup>PHQ-9: Patient Health Questionnaire 9

<sup>e</sup>The behavior including reading health knowledge and watching educational videos were caught and uploaded automatically.
