# Supplementary material for: Using Mobile Health Technology to Deliver a Community-Based Closed-Loop Management System for Chronic Obstructive Pulmonary Disease Patients in Remote Areas of China: Development and Prospective Observational Study
Source: PubMed Central journal article supplement (PMC7725649; doi:10.2196/15978), 2020-11-25
Supplement: mhealth_v8i11e15978_app3.pdf [file mhealth_v8i11e15978_app3.pdf]

## Details of Outcomes

Supplementary Table 1 Details of warning events, exacerbations, hospitalization, and clinic visit.

| Patient number | Hospitalization, n/6 months |           | Clinic visits, n/6 months |           | Warning events, n | AE, n      |
|----------------|-----------------------------|-----------|---------------------------|-----------|-------------------|------------|
|                | before                      | after     | before                    | after     |                   |            |
| 1              | 1                           | 0         | 0                         | 0         | 1                 | 1          |
| 2              | 4                           | 0         | 6                         | 2         | 34                | 4          |
| 3              | 0                           | 0         | 3                         | 1         | 0                 | 2          |
| 4              | 2                           | 0         | 1                         | 0         | 0                 | 1          |
| 5              | 3                           | 2         | 5                         | 3         | 73                | 7          |
| 6              | 1                           | 0         | 4                         | 3         | 0                 | 3          |
| 7              | 3                           | 1         | 0                         | 1         | 1                 | 2          |
| 8              | 2                           | 0         | 0                         | 0         | 9                 | 3          |
| 9              | 3                           | 1         | 0                         | 0         | 12                | 3          |
| 10             | 0                           | 0         | 2                         | 0         | 0                 | 1          |
| 11             | 2                           | 0         | 0                         | 0         | 0                 | 1          |
| 12             | 3                           | 1         | 0                         | 6         | 27                | 7          |
| 13             | 3                           | 2         | 0                         | 0         | 74                | 5          |
| 14             | 0                           | 0         | 1                         | 0         | 1                 | 1          |
| 15             | 3                           | 0         | 10                        | 9         | 0                 | 9          |
| 16             | 2                           | 0         | 3                         | 2         | 2                 | 3          |
| 17             | 0                           | 0         | 2                         | 1         | 0                 | 1          |
| 18             | 4                           | 2         | 4                         | 3         | 55                | 5          |
| 19             | 4                           | 2         | 0                         | 0         | 4                 | 2          |
| 20             | 0                           | 0         | 3                         | 1         | 0                 | 2          |
| 21             | 0                           | 0         | 3                         | 2         | 80                | 5          |
| 22             | 2                           | 0         | 2                         | 0         | 0                 | 1          |
| 23             | 2                           | 0         | 2                         | 2         | 0                 | 2          |
| 24             | 2                           | 0         | 3                         | 0         | 0                 | 1          |
| 25             | 0                           | 0         | 1                         | 0         | 2                 | 2          |
| 26             | 3                           | 1         | 10                        | 3         | 0                 | 4          |
| 27             | 1                           | 0         | 8                         | 2         | 19                | 5          |
| 28             | 0                           | 0         | 0                         | 0         | 0                 | 0          |
| 29             | 3                           | 0         | 7                         | 6         | 5                 | 6          |
| 30             | 3                           | 0         | 6                         | 3         | 50                | 5          |
| 31             | 2                           | 0         | 4                         | 0         | 1                 | 2          |
| 32             | 1                           | 0         | 2                         | 0         | 0                 | 1          |
| 33             | 3                           | 5         | 6                         | 0         | 1                 | 5          |
| 34             | 3                           | 0         | 9                         | 0         | 5                 | 1          |
| 35             | 1                           | 0         | 5                         | 1         | 0                 | 1          |
| 36             | 1                           | 1         | 0                         | 0         | 2                 | 1          |
| 37             | 0                           | 0         | 2                         | 1         | 0                 | 1          |
| 38             | 1                           | 0         | 1                         | 0         | 1                 | 1          |
| 39             | 1                           | 1         | 0                         | 0         | 0                 | 3          |
| <b>Total</b>   | <b>69</b>                   | <b>19</b> | <b>115</b>                | <b>52</b> | <b>459</b>        | <b>110</b> |

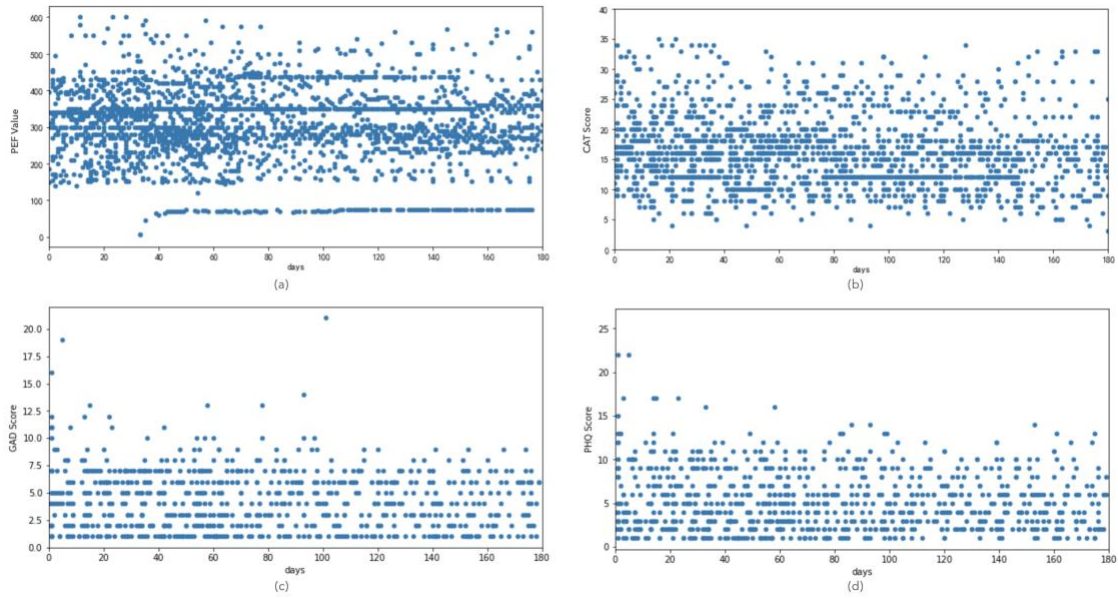

**Supplementary Figure 1** Data records from patients during this study. (a) Records for the PEF. (b) Records for the CAT scale. (c) Records for the GAD-7 scale. (d) Records for the PHQ-9 scale.
